# Supplementary material for: A simple and effective method for the accurate extraction of kinetic parameters using differential Tafel plots
Source: Sci Rep. 2021 Apr 26;11:8974. doi: 10.1038/s41598-021-87951-z (PMC8076256; doi:10.1038/s41598-021-87951-z)
Supplement: Supplementary file 1 — Supplementary Information. [file 41598_2021_87951_MOESM1_ESM.docx]

Supplemental Information

A simple and effective method for the accurate extraction of kinetic parameters using differential Tafel plots

Prashant Khadke,*[a] Tim Tichter,[b] Tim Boettcher, [c] Falk Muench, [c] Wolfgang Ensinger, [c] Christina Roth[a]

[a] Dr. P. Khadke, Prof. C. Roth
Faculty of Engineering Sciences
University of Bayreuth
Universitaetsstr.30, D-95440 Bayreuth, Germany
E-mail: [prashant.khadke@uni-bayreuth.de](mailto:prashant.khadke@uni-bayreuth.de)

Christina.Roth@uni-bayreuth.de

[b] MSc. T. Tichter
Physical and Theoretical Chemistry
Free University of Berlin
Takustr. 3, D-14195 Berlin, Germany

E-mail: t.tichter@fu-berlin.de

[c] MSc. T. Tim Boettcher, Dr. F. Muench, Prof. W. Ensinger
Department of Materials- and Geoscience
Technische Universitaet Darmstadt
Alarich-Weiss-Str. 2,64287 Darmstadt, Germany

E-mail: [boettcher@ma.tu-darmstadt.de](mailto:boettcher@ma.tu-darmstadt.de)

[muench@ma.tu-darmstadt.de](mailto:muench@ma.tu-darmstadt.de)

wolfgang.ensinger@tu-darmstadt.de

Please refer to the manuscript for the equation numbers.

**Derivation of equation 10**

From equation 13

For the positive values of overpotential and at

>>

**Derivation of equation 14**

substituting and, in equation 9 we get,

taking natural logarithm,

**Derivation of equation 16**

Substituting in equation 9 we get

=

Taking natural logarithm

**Derivation of equation 17**

Rearranging equation 9 we get,

When we set , then , since . Substituting in above equation we get,

Substituting this value of in equation 16,

or,
